# Supplementary material for: Large Uncertainties Are Pervasive in Long-Term Frequency-Magnitude Relationships for Volcanoes in Southeast Asia
Source: Frontiers journal article supplement (doi:10.3389/feart.2022.895756), 2022-06-28
Supplement: Data_Sheet_1.XLSX [file Data_Sheet_1.XLSX]

## Sheet: Sheet1
Volcano	Volcano number	Country	Annual probability of eruption	Annual probability of eruption at VEI							Reference
				1	2	3	4	5	6	7
Merapi	263250	Indonesia	2.5x10-1 – 2.94x10-1	-	-	-	-	-	-	-	Gertisser et al. (2012)
			1.43x10-1	-	-	-	-	-	-	-	Bebbington (2014)
			2.5x10-1 – 1.67x10-1	-	-	-	1x10-2	-	-	-	Surono et al. (2012)
			-	-	1.67x10-1 – 2.5x10-1	-	1x10-2	-	-	-	Rezki-Hr et al. (2019) citing Thouret et al. (2000) and Surono et al. (2012)
			1x10-1	-	-	-	-	-	-	-	Sagala (2009)
			3.68x10-1	4.20x10-2	1.30x10-1	2.00x10-2	1.20x10-1	4.40x10-2	1.00x10-2	1.70x10-3	Bear-Crozier et al. (2016); Miller et al. (2016)
			1.25x10-2	-	-	-	-	-	-	-	Andreastuti et al. (2000)
			2.50x10-1	-	-	-	-	-	-	-	Jenkins et al. (2012)
			5.18x10-1	1.60x10-1	3.27x10-1	3.00x10-2	4.8x10-3	1.00x10-3	0	0	Whelley et al. (2015)
			2x10-1 – 3.33x10-1	-	-	-	-	-	-	-	Napsiah et al. (2017)
			1x10-1 – 3.33x10-1	-	-	-	-	-	-	-	Purwadi et al. (2016) citing Newhall et al. (2000)
			2.00x10-1	1.67x10-1			1.35x10-2	3.85x10-3	9.26x10-4	8.62x10-4	Jenkins et al. (2015)
			-	-	-	-	4.69x10-3				Jenkins et al. (2018)
Gede-Pangrango	263060	Indonesia	9.58x10-2	1.60x10-2	5.00x10-2	7.60x10-3	4.80x10-2	1.70x10-2	4.00x10-3	6.70x10-4	Bear-Crozier et al. (2016); Miller et al. (2016)
			8.33x10-2	7.69x10-2			5.71x10-3	1.6x10-3	3.95x10-4	3.70x10-4	Jenkins et al. (2015)
			9.71x10-2	-	-	-	-	-	-	-	Bebbington (2014)
			1.8x10-1	0	1.6x10-1	2x10-2	0	0	0	0	Whelley et al. (2015)
			-	-	-	-	2.2x10-3				Jenkins et al. (2018)
Malabar	263081	Indonesia	4.97x10-2	2.3x10-2	2.2x10-2	2.4x10-3	1.4x10-3	9.1x10-5	0	0	Whelley et al. (2015)
Tangkuban parahu	263090	Indonesia	6.25x10-2	5.56x10-2			4.35x10-3	1.24x10-3	2.98x10-4	2.79x10-4	Jenkins et al. (2015)
			1.4x10-1	1.4x10-1	0	0	0	0	0	0	Whelley et al. (2015)
			8.84x10-2	-	3.48x10-2	5.30x10-3	3.33x10-2	1.18x10-2	2.78x10-3	4.63x10-4	Bear-Crozier et al. (2016); Miller et al. (2016)
			-	-	-	-	2.2x10-3				Jenkins et al. (2018)
Guntur	263130	Indonesia	9.09x10-2	8.33x10-2			1.55x10-2	1.82x10-3	4.39x10-4	4.12x10-4	Jenkins et al. (2015)
			3.03x10-1	-	-	-	-	-	-	-	Bebbington (2014)
			9.16x10-2	1.60x10-2	4.80x10-2	7.30x10-3	4.60x10-2	1.60x10-2	3.80x10-3	6.40x10-4	Bear-Crozier et al. (2016); Miller et al. (2016)
			2.1x10-2	2.00x10-2	0	0	0	1.00x10-3	0	0	Whelley et al. (2015)
			-	-	-	-	2.2x10-3				Jenkins et al. (2018)
Tampomas	263131	Indonesia	4.89x10-2	2.3x10-2	2.2x10-2	2.4x10-3	1.4x10-3	9.1x10-5	0	0	Whelley et al. (2015)
Gunung Putri	263160	Indonesia	4.89x10-2	2.3x10-2	2.2x10-2	2.4x10-3	1.4x10-3	9.1x10-5	0	0	Whelley et al. (2015)
Dieng Volcanic Complex	263200	Indonesia	9.09x10-2	7.69x10-2			6.06x10-3	1.74x10-3	4.18x10-4	3.92x10-4	Jenkins et al. (2015)
			9.16x10-2	1.60x10-2	4.80x10-2	7.30x10-3	4.60x10-2	1.60x10-2	3.80x10-3	6.40x10-4	Bear-Crozier et al. (2016); Miller et al. (2016)
			1.98x10-1	1.8x10-1	1.8x10-2	0	0	0	0	0	Whelley et al. (2015)
			-	-	-	-	2.2x10-3				Jenkins et al. (2018)
Sundoro	263210	Indonesia	3.85x10-2	3.45x10-2			2.67x10-3	7.63x10-4	1.83x10-4	1.72x10-4	Jenkins et al. (2015)
			1.86x10-1	4x10-2	1.2x10-1	2x10-2	4.8x10-3	1x10-3	0	0	Whelley et al. (2015)
			4.98x10-2	-	1.96x10-2	2.98x10-3	1.88x10-2	6.64x10-3	1.56x10-3	2.60x10-4	Bear-Crozier et al. (2016); Miller et al. (2016)
			-	-	-	-	4.00x10-3				Jenkins et al. (2018)
Sumbing	263220	Indonesia	9.09x10-3	8.33x10-3			6.41x10-4	1.82x10-4	4.39x10-5	4.12x10-5	Jenkins et al. (2015)
			4.89x10-2	2.3x10-2	2.2x10-2	2.4x10-3	1.4x10-3	9.1x10-5	0	0	Whelley et al. (2015)
			1.7x10-2	-	4.35x10-3	6.62x10-4	4.17x10-3	1.48x10-3	3.47x10-4	5.79x10-5	Bear-Crozier et al. (2016); Miller et al. (2016)
			-	-	-	-	7.30x10-4				Jenkins et al. (2018)
Merbabu	263240	Indonesia	6.67x10-3	6.06x10-3			4.63x10-4	1.32x10-4	3.17x10-5	2.98x10-5	Jenkins et al. (2015)
			1.9x10-1	7.7x10-2	1x10-1	1.2x10-2	7.1x10-4	1.5x10-4	0	0	Whelley et al. (2015)
			5.53x10-3	-	2.18x10-3	3.31x10-4	2.08x10-3	7.38x10-4	1.74x10-4	2.89x10-5	Bear-Crozier et al. (2016); Miller et al. (2016)
			-	-	-	-	7.30x10-4				Jenkins et al. (2018)
Penanggungan	263291	Indonesia	4.89x10-2	2.3x10-2	2.2x10-2	2.4x10-3	1.4x10-3	9.1x10-5	0	0	Whelley et al. (2015)
Malang Plain	263292	Indonesia	6.2x10-2	4.7x10-2	1.5x10-2	0	0	0	0	0	Whelley et al. (2015)
Bratan	264001	Indonesia	3.12x10-3	0	1.4x10-3	1.5x10-3	0	1.5x10-4	3.8x10-5	3.1x10-5	Whelley et al. (2015)
Batur	264010	Indonesia	1.00x10-1	9.09x10-2			8.33x10-3	4.08x10-3	2.06x10-3	4.93x10-4	Jenkins et al. (2015)
			-	-	-	-	2.22x10-3				Jenkins et al. (2018)
			1.08x10-1	4.10x10-3	8.10x10-3	8.20x10-4	1.30x10-2	2.60x10-3	2.60x10-3	3.80x10-4	Bear-Crozier et al. (2016); Miller et al. (2016)
			3.26x10-3	0	1.4x10-3	1.5x10-3	0	1.5x10-4	3.8x10-5	1.3x10-4	Whelley et al. (2015)
Tondano Caldera(s)	266070	Indonesia	3.16x10-3	0	1.4x10-3	1.5x10-3	0	1.5x10-4	3.8x10-5	3.1x10-5	Whelley et al. (2015)
San Pablo Volcanic Field	273060	Philippines	1.48x10-3	1.35x10-3			1.04x10-4	2.97x10-5	7.13x10-6	6.68x10-6	Jenkins et al. (2015)
			6.18x10-2	4.7x10-2	1.5x10-2	0	0	0	0	0	Whelley et al. (2015)
			-	-	-	-	1.35x10-4				Jenkins et al. (2018)
Taal	273070	Philippines	8.33x10-2	7.14x10-2			6.67x10-3	3.39x10-3	1.69x10-3	4.07x10-4	Jenkins et al. (2015)
			1.38x10-1	4x10-2	7.3x10-2	2x10-2	4.8x10-3	0	0	0	Whelley et al. (2015)
			2.25x10-2	-	6.66x10-3	6.71x10-4	1.05x10-2	2.16x10-3	2.16x10-3	3.09x10-4	Bear-Crozier et al. (2016); Miller et al. (2016)
			-	-	-	-	1.2x10-2				Jenkins et al. (2018)
Laguna Caldera(s)	273080	Philippines	3.12x10-3	0	1.4x10-3	1.5x10-3	0	1.5x10-4	3.8x10-5	3.1x10-5	Whelley et al. (2015)
Arayat	273084	Philippines	4.89x10-2	2.3x10-2	2.2x10-2	2.4x10-3	1.4x10-3	9.1x10-5	0	0	Whelley et al. (2015)
Hainan Dao	275001	China	1.47x10-2	1.39x10-2			7.35x10-4	1.18x10-4	-	-	Jenkins et al. (2015)
			6.2x10-2	4.7x10-2	1.5x10-2	0	0	0	0	0	Whelley et al. (2015)
Leizhou Bandao	275010	China	6.2x10-2	4.7x10-2	1.5x10-2	0	0	0	0	0	Whelley et al. (2015)
Bas Dong Nai	275050	Vietnam	6.2x10-2	4.7x10-2	1.5x10-2	0	0	0	0	0	Whelley et al. (2015)
Lower Chindwin	275090	Burma (Myanmar)	6.2x10-2	4.7x10-2	1.5x10-2	0	0	0	0	0	Whelley et al. (2015)
